# Supplementary material for: Inconsistencies and Ambiguities in Liver-Disease-Related Contraindications—A Systematic Analysis of SmPCs/PI of Major Drug Markets
Source: MDPI journal article supplement (doi:10.3390/jcm11071933), 2022-03-30
Supplement: s1 [file s1]

**Table S2: Category names and terms that were assigned to the respective categories. Complete list (English and German)**

| Category            | Terms                                                                                                                                                                                                                                                                                                                                                                                                                                                                                     |
|---------------------|-------------------------------------------------------------------------------------------------------------------------------------------------------------------------------------------------------------------------------------------------------------------------------------------------------------------------------------------------------------------------------------------------------------------------------------------------------------------------------------------|
| hepatic impairment  | Leberfunktionsstörung, Funktionsstörung der Leber, hepatische Funktionsstörung, Beeinträchtigung der Leberfunktion, Eingeschränkte/Einschränkung der Leberfunktion, Leberfunktionseinschränkung, Leberfunktionsabnormalität, Hepatopathie, hepatische Dysfunktion, hepatic dysfunction, liver dysfunction, impairment of liver function, liver function abnormality, hepatic function disorder, decompensated hepatic function, impaired hepatic function, impairment of hepatic function |
| liver disease       | Lebererkrankung, Leberparenchymerkrankung, Lebertumore, Leberkrankheit, Leberleiden, Leberparenchymschädigung, Leberparenchymschaden, hepatic disease, hepatic damage                                                                                                                                                                                                                                                                                                                     |
| liver insufficiency | Leberinsuffizienz, hepatische Insuffizienz, hepatic insufficiency                                                                                                                                                                                                                                                                                                                                                                                                                         |
| liver cirrhosis     | Leberzirrhose, biliäre Zirrhose, Zirrhose, cirrhosis, biliary cirrhosis, hepatic cirrhosis                                                                                                                                                                                                                                                                                                                                                                                                |
| transaminases       | Leberenzymwerte, Serum-Transaminasen, Transaminasewerte, Serum-Transaminasekonzentration, serum transaminases                                                                                                                                                                                                                                                                                                                                                                             |
| porphyria           | Porphyrie                                                                                                                                                                                                                                                                                                                                                                                                                                                                                 |
| Child-Pugh          | Child-Pugh (Klasse/class/Score)                                                                                                                                                                                                                                                                                                                                                                                                                                                           |
| precoma/coma        | Coma hepaticum, Praecoma hepaticum, hepatische Encephalopathie, hepatic coma, hepatic encephalopathy, precomatose states (associated with liver cirrhosis)                                                                                                                                                                                                                                                                                                                                |
| jaundice            | Gelbsucht, Verschlusshikterus, Ikterus                                                                                                                                                                                                                                                                                                                                                                                                                                                    |
| hepatic failure     | Leberversagen                                                                                                                                                                                                                                                                                                                                                                                                                                                                             |
| hepatitis           | Hepatitis                                                                                                                                                                                                                                                                                                                                                                                                                                                                                 |
| ascites             | Aszites                                                                                                                                                                                                                                                                                                                                                                                                                                                                                   |
| albumin             | Serumalbumin (Serum-Albumin), serum albumin                                                                                                                                                                                                                                                                                                                                                                                                                                               |
