# Supplementary material for: Inconsistencies and Ambiguities in Liver-Disease-Related Contraindications—A Systematic Analysis of SmPCs/PI of Major Drug Markets
Source: MDPI journal article supplement (doi:10.3390/jcm11071933), 2022-03-30
Supplement: s1 [file s1]

**Table S4: Examples of assigning conditions to different severity grades of hepatic impairment**

| Term                        | Disease/lab parameter               |
|-----------------------------|-------------------------------------|
| Severe hepatic impairment   | Liver cirrhosis, Child-Pugh-Score C |
| Severe hepatic impairment   | Acute hepatitis                     |
| Severe hepatic impairment   | Serum Albumin < 25 g/l              |
| Severe hepatic impairment   | Coma/Precoma hepaticum              |
| Moderate hepatic impairment | Liver cirrhosis, Child-Pugh-Score B |
| Mild hepatic impairment     | Liver cirrhosis, Child-Pugh-Score A |

Further, often used combinations of terms in SmPCs/PI might be added to the list, when a consensus for severity is established. For example, 'active liver disease or unexplained persistent elevations of serum transaminases exceeding 3 times the upper limit of normal' could be used as a lab value (serum transaminases, > 3 × ULN) for defining 'active liver disease'. Still there is uncertainty to what conditions 'unexplained and persistent' includes.
