# Supplementary material for: Inconsistencies and Ambiguities in Liver-Disease-Related Contraindications—A Systematic Analysis of SmPCs/PI of Major Drug Markets
Source: MDPI journal article supplement (doi:10.3390/jcm11071933), 2022-03-30
Supplement: s1 [file s1]

**Table S3: Translation of German phrases used in the German or Swiss SmPCs translated into English**

Terms that were translated from German into English in this paper, marked with asterisk (\*).

| Translation in text                                                                                         | Term in SmPC                                                                                                                       |
|-------------------------------------------------------------------------------------------------------------|------------------------------------------------------------------------------------------------------------------------------------|
| obstructive jaundice                                                                                        | Verschlussikterus                                                                                                                  |
| severe hepatic impairment (liver cirrhosis and ascites)                                                     | Schwere Leberfunktionsstörungen (Leberzirrhose und Aszites)                                                                        |
| with severe liver function impairment (for example liver cirrhosis)                                         | mit schwerer Leberfunktionsstörung (z. B. Leberzirrhose)                                                                           |
| liver function impairment with fatal outcome during therapy with valproic acid in siblings                  | Leberfunktionsstörungen mit tödlichem Ausgang während einer Valproinsäuretherapie bei Geschwistern                                 |
| liver tumors                                                                                                | Lebertumore                                                                                                                        |
| Acute or chronic liver disease (Rotor- or Dubin-Johnson-Syndrome)                                           | akute oder chronische Leberleiden (Rotor- oder Dubin-Johnson-Syndrom)                                                              |
| marked                                                                                                      | ausgeprägte                                                                                                                        |
| high-grade                                                                                                  | hochgradige                                                                                                                        |
| clinically manifest                                                                                         | klinisch manifeste                                                                                                                 |
| mild and moderate liver insufficiency (in children ALAT > 5 x ULN or bilirubin > 2 x ULN) with coagulopathy | leichter und mässiggradiger Leberinsuffizienz (bei Kindern ALAT > 5x ULN oder Bilirubin > 2x ULN) in Kombination mit Koagulopathie |
| hepatitis                                                                                                   | Hepatitis                                                                                                                          |
| liver insufficiency (liver cirrhosis and ascites)                                                           | Leberinsuffizienz (Leberzirrhose und Aszites)                                                                                      |
| patients with severe hepatic impairment (for example acute hepatitis)                                       | Patienten mit schwerer Leberfunktionsstörung (z. B. akute Hepatitis)                                                               |
| severe hepatic impairment with coma/precoma hepaticum                                                       | Schweren Leberfunktionsstörungen mit Bewusstseinseintrübung (Coma oder Praecoma hepaticum)                                         |
