# Supplementary material for: Inconsistencies and Ambiguities in Liver-Disease-Related Contraindications—A Systematic Analysis of SmPCs/PI of Major Drug Markets
Source: MDPI journal article supplement (doi:10.3390/jcm11071933), 2022-03-30
Supplement: s1 [file s1]

**Table S1: Selection of drugs for analysis**

Final list of active ingredients chosen for the analysis, drug markets where products were available and SmPC/PI source

| Drug                        | Drug Market | SmPC/PI Source                                             |
|-----------------------------|-------------|------------------------------------------------------------|
| Acetylsalicylic acid        | CH          | compendium.ch                                              |
| Acetylsalicylic acid        | DE          | pharmnet.bund                                              |
| Acetylsalicylic acid        | UK          | electronic medicines compendium (emc)                      |
| Acetylsalicylic acid        | US          | www.drugs.com/pro/aspirin.html                             |
| Agomelatine                 | CH          | compendium.ch                                              |
| Agomelatine                 | DE          | fachinfo.de                                                |
| Agomelatine                 | UK          | electronic medicines compendium (emc)                      |
| Alfuzosin                   | CH          | compendium.ch                                              |
| Alfuzosin                   | DE          | pharmnet.bund                                              |
| Alfuzosin                   | UK          | electronic medicines compendium (emc)                      |
| Alfuzosin                   | US          | www.drugs.com/pro/alfuzosin.html                           |
| Amoxicillin/clavulanic acid | CH          | compendium.ch                                              |
| Amoxicillin/clavulanic acid | DE          | pharmnet.bund                                              |
| Amoxicillin/clavulanic acid | UK          | electronic medicines compendium (emc)                      |
| Amoxicillin/clavulanic acid | US          | www.drugs.com/pro/amoxicillin-and-clavulanate-tablets.html |
| Apixaban                    | CH          | compendium.ch                                              |
| Apixaban                    | DE          | fachinfo.de                                                |
| Apixaban                    | UK          | electronic medicines compendium (emc)                      |
| Apixaban                    | US          | www.drugs.com/pro/apixaban.html                            |
| Atorvastatin                | CH          | compendium.ch                                              |
| Atorvastatin                | DE          | pharmnet.bund                                              |
| Atorvastatin                | UK          | electronic medicines compendium (emc)                      |
| Atorvastatin                | US          | www.drugs.com/pro/atorvastatin.html                        |
| Budesonide                  | CH          | compendium.ch                                              |
| Budesonide                  | DE          | pharmnet.bund                                              |
| Budesonide                  | UK          | electronic medicines compendium (emc)                      |
| Budesonide                  | US          | www.drugs.com/pro/budesonide-er-tablets.html               |

|                               |    |                                                          |
|-------------------------------|----|----------------------------------------------------------|
| Bupropion                     | CH | compendium.ch                                            |
| Bupropion                     | DE | pharmnet.bund                                            |
| Bupropion                     | UK | electronic medicines compendium (emc)                    |
| Bupropion                     | US | www.drugs.com/pro/bupropion.html                         |
| Candesartan                   | CH | compendium.ch                                            |
| Candesartan                   | DE | pharmnet.bund                                            |
| Candesartan                   | UK | electronic medicines compendium (emc)                    |
| Candesartan                   | US | www.drugs.com/pro/candesartan.html                       |
| Carbamazepine                 | CH | compendium.ch                                            |
| Carbamazepine                 | DE | pharmnet.bund                                            |
| Carbamazepine                 | UK | electronic medicines compendium (emc)                    |
| Carbamazepine                 | US | www.drugs.com/pro/carbamazepine.html                     |
| Carbidopa/Levodopa/Entacapone | CH | compendium.ch                                            |
| Carbidopa/Levodopa/Entacapone | DE | fachinfo.de                                              |
| Carbidopa/Levodopa/Entacapone | UK | electronic medicines compendium (emc)                    |
| Carbidopa/Levodopa/Entacapone | US | www.drugs.com/pro/carbidopa-levodopa-and-entacapone.html |
| Carvedilol                    | CH | compendium.ch                                            |
| Carvedilol                    | DE | pharmnet.bund                                            |
| Carvedilol                    | UK | electronic medicines compendium (emc)                    |
| Carvedilol                    | US | www.drugs.com/pro/carvedilol.html                        |
| Celecoxib                     | CH | compendium.ch                                            |
| Celecoxib                     | DE | pharmnet.bund                                            |
| Celecoxib                     | UK | electronic medicines compendium (emc)                    |
| Celecoxib                     | US | www.drugs.com/pro/celecoxib.html                         |
| Certoparin sodium             | DE | pharmnet.bund                                            |
| Chlortalidone                 | DE | pharmnet.bund                                            |
| Chlortalidone                 | UK | electronic medicines compendium (emc)                    |
| Chlortalidone                 | US | www.drugs.com/pro/chlorthalidone.html                    |
| Clarithromycin                | CH | compendium.ch                                            |
| Clarithromycin                | DE | pharmnet.bund                                            |
| Clarithromycin                | UK | electronic medicines compendium (emc)                    |
| Clarithromycin                | US | www.drugs.com/pro/clarithromycin.html                    |
| Clonazepam                    | CH | compendium.ch                                            |
| Clonazepam                    | DE | pharmnet.bund                                            |

|                                                  |    |                                                                                                                                        |
|--------------------------------------------------|----|----------------------------------------------------------------------------------------------------------------------------------------|
| Clonazepam                                       | UK | electronic medicines compendium (emc)                                                                                                  |
| Clonazepam                                       | US | <a href="http://www.drugs.com/pro/clonazepam.html">www.drugs.com/pro/clonazepam.html</a>                                               |
| Clopidogrel                                      | CH | <a href="http://compendium.ch">compendium.ch</a>                                                                                       |
| Clopidogrel                                      | DE | <a href="http://pharmnet.bund">pharmnet.bund</a>                                                                                       |
| Clopidogrel                                      | UK | electronic medicines compendium (emc)                                                                                                  |
| Clopidogrel                                      | US | <a href="http://www.drugs.com/pro/clopidogrel.html">www.drugs.com/pro/clopidogrel.html</a>                                             |
| Clozapine                                        | CH | <a href="http://compendium.ch">compendium.ch</a>                                                                                       |
| Clozapine                                        | DE | <a href="http://pharmnet.bund">pharmnet.bund</a>                                                                                       |
| Clozapine                                        | UK | electronic medicines compendium (emc)                                                                                                  |
| Clozapine                                        | US | <a href="http://www.drugs.com/pro/clozapine.html">www.drugs.com/pro/clozapine.html</a>                                                 |
| Levodopa/Benserazide                             | CH | <a href="http://compendium.ch">compendium.ch</a>                                                                                       |
| Levodopa/Benserazide                             | DE | <a href="http://pharmnet.bund">pharmnet.bund</a>                                                                                       |
| Levodopa/Benserazide                             | UK | electronic medicines compendium (emc)                                                                                                  |
| Cotrimoxazole<br>(Trimethoprim/Sulfamethoxazole) | CH | <a href="http://compendium.ch">compendium.ch</a>                                                                                       |
| Cotrimoxazole<br>(Trimethoprim/Sulfamethoxazole) | DE | <a href="http://pharmnet.bund">pharmnet.bund</a>                                                                                       |
| Cotrimoxazole<br>(Trimethoprim/Sulfamethoxazole) | UK | electronic medicines compendium (emc)                                                                                                  |
| Cotrimoxazole<br>(Trimethoprim/Sulfamethoxazole) | US | <a href="http://www.drugs.com/pro/sulfamethoxazole-and-trimethoprim.html">www.drugs.com/pro/sulfamethoxazole-and-trimethoprim.html</a> |
| Dabigatran etexilate                             | CH | <a href="http://compendium.ch">compendium.ch</a>                                                                                       |
| Dabigatran etexilate                             | DE | <a href="http://fachinfo.de">fachinfo.de</a>                                                                                           |
| Dabigatran etexilate                             | UK | electronic medicines compendium (emc)                                                                                                  |
| Dabigatran etexilate                             | US | <a href="http://www.drugs.com/pro/dabigatran-capsules.html">www.drugs.com/pro/dabigatran-capsules.html</a>                             |
| Diazepam                                         | CH | <a href="http://compendium.ch">compendium.ch</a>                                                                                       |
| Diazepam                                         | DE | <a href="http://pharmnet.bund">pharmnet.bund</a>                                                                                       |
| Diazepam                                         | UK | electronic medicines compendium (emc)                                                                                                  |
| Diazepam                                         | US | <a href="http://www.drugs.com/pro/diazepam.html">www.drugs.com/pro/diazepam.html</a>                                                   |
| Diclofenac                                       | CH | <a href="http://compendium.ch">compendium.ch</a>                                                                                       |
| Diclofenac                                       | DE | <a href="http://pharmnet.bund">pharmnet.bund</a>                                                                                       |
| Diclofenac                                       | UK | electronic medicines compendium (emc)                                                                                                  |
| Diclofenac                                       | US | <a href="http://www.drugs.com/pro/diclofenac.html">www.drugs.com/pro/diclofenac.html</a>                                               |
| Dimenhydrinate                                   | DE | <a href="http://pharmnet.bund">pharmnet.bund</a>                                                                                       |
| Dimenhydrinate                                   | US | <a href="http://www.drugs.com/pro/dimenhydrinate.html">www.drugs.com/pro/dimenhydrinate.html</a>                                       |
| Domperidone                                      | CH | <a href="http://compendium.ch">compendium.ch</a>                                                                                       |

|             |    |                                            |
|-------------|----|--------------------------------------------|
| Domperidone | DE | pharmnet.bund                              |
| Domperidone | UK | electronic medicines compendium (emc)      |
| Doxycycline | CH | compendium.ch                              |
| Doxycycline | DE | pharmnet.bund                              |
| Doxycycline | UK | electronic medicines compendium (emc)      |
| Doxycycline | US | www.drugs.com/pro/doxycycline.html         |
| Duloxetine  | CH | compendium.ch                              |
| Duloxetine  | DE | fachinfo.de                                |
| Duloxetine  | UK | electronic medicines compendium (emc)      |
| Duloxetine  | US | www.drugs.com/pro/duloxetine-capsules.html |
| Edoxaban    | CH | compendium.ch                              |
| Edoxaban    | DE | manufacturers homepage                     |
| Edoxaban    | UK | electronic medicines compendium (emc)      |
| Edoxaban    | US | www.drugs.com/pro/savaysa.html             |
| Eplerenone  | CH | compendium.ch                              |
| Eplerenone  | DE | pharmnet.bund                              |
| Eplerenone  | UK | electronic medicines compendium (emc)      |
| Eplerenone  | US | www.drugs.com/pro/eplerenone.html          |
| Etoricoxib  | CH | compendium.ch                              |
| Etoricoxib  | DE | pharmnet.bund                              |
| Etoricoxib  | UK | electronic medicines compendium (emc)      |
| Ezetimibe   | CH | compendium.ch                              |
| Ezetimibe   | DE | pharmnet.bund                              |
| Ezetimibe   | UK | electronic medicines compendium (emc)      |
| Ezetimibe   | US | www.drugs.com/pro/ezetimibe.html           |
| Fenofibrate | CH | compendium.ch                              |
| Fenofibrate | DE | pharmnet.bund                              |
| Fenofibrate | UK | electronic medicines compendium (emc)      |
| Fenofibrate | US | www.drugs.com/pro/fenofibrate-tablets.html |
| Furosemide  | CH | compendium.ch                              |
| Furosemide  | DE | pharmnet.bund                              |
| Furosemide  | UK | electronic medicines compendium (emc)      |
| Furosemide  | US | www.drugs.com/pro/furosemide.html          |
| Glimepiride | CH | compendium.ch                              |

|                     |    |                                                           |
|---------------------|----|-----------------------------------------------------------|
| Glimepiride         | DE | pharmnet.bund                                             |
| Glimepiride         | UK | electronic medicines compendium (emc)                     |
| Glimepiride         | US | www.drugs.com/pro/glimepiride.html                        |
| Hydrochlorothiazide | CH | compendium.ch                                             |
| Hydrochlorothiazide | DE | pharmnet.bund                                             |
| Hydrochlorothiazide | US | www.drugs.com/pro/hydrochlorothiazide.html                |
| Ibuprofen           | CH | compendium.ch                                             |
| Ibuprofen           | DE | pharmnet.bund                                             |
| Ibuprofen           | UK | electronic medicines compendium (emc)                     |
| Ibuprofen           | US | www.drugs.com/pro/ibuprofen.html                          |
| Indapamide          | CH | compendium.ch                                             |
| Indapamide          | DE | pharmnet.bund                                             |
| Indapamide          | UK | electronic medicines compendium (emc)                     |
| Indapamide          | US | www.drugs.com/pro/indapamide.html                         |
| Ivabradine          | CH | compendium.ch                                             |
| Ivabradine          | DE | pharmnet.bund                                             |
| Ivabradine          | UK | electronic medicines compendium (emc)                     |
| Ivabradine          | US | www.drugs.com/pro/corlanor.html                           |
| Lercanidipine       | CH | compendium.ch                                             |
| Lercanidipine       | DE | pharmnet.bund                                             |
| Lercanidipine       | UK | electronic medicines compendium (emc)                     |
| Losartan            | CH | compendium.ch                                             |
| Losartan            | DE | pharmnet.bund                                             |
| Losartan            | UK | electronic medicines compendium (emc)                     |
| Losartan            | US | www.drugs.com/pro/losartan.html                           |
| Melperone           | DE | pharmnet.bund                                             |
| Mesalazine          | CH | compendium.ch                                             |
| Mesalazine          | DE | pharmnet.bund                                             |
| Mesalazine          | UK | electronic medicines compendium (emc)                     |
| Mesalazine          | US | www.drugs.com/pro/mesalamine-delayed-release-tablets.html |
| Metamizole          | CH | compendium.ch                                             |
| Metamizole          | DE | pharmnet.bund                                             |
| Metformin           | CH | compendium.ch                                             |
| Metformin           | DE | pharmnet.bund                                             |

|                    |    |                                                                                                                                          |
|--------------------|----|------------------------------------------------------------------------------------------------------------------------------------------|
| Metformin          | UK | electronic medicines compendium (emc)                                                                                                    |
| Metformin          | US | <a href="http://www.drugs.com/pro/metformin.html">www.drugs.com/pro/metformin.html</a>                                                   |
| Methotrexate       | CH | <a href="http://compendium.ch">compendium.ch</a>                                                                                         |
| Methotrexate       | DE | <a href="http://pharmnet.bund">pharmnet.bund</a>                                                                                         |
| Methotrexate       | UK | electronic medicines compendium (emc)                                                                                                    |
| Methotrexate       | US | <a href="http://www.drugs.com/pro/methotrexate-sodium.html">www.drugs.com/pro/methotrexate-sodium.html</a>                               |
| Midazolam          | CH | <a href="http://compendium.ch">compendium.ch</a>                                                                                         |
| Midazolam          | DE | <a href="http://pharmnet.bund">pharmnet.bund</a>                                                                                         |
| Morphine           | CH | <a href="http://compendium.ch">compendium.ch</a>                                                                                         |
| Morphine           | DE | <a href="http://pharmnet.bund">pharmnet.bund</a>                                                                                         |
| Morphine           | UK | electronic medicines compendium (emc)                                                                                                    |
| Morphine           | US | <a href="http://www.drugs.com/pro/morphine-extended-release-capsules.html">www.drugs.com/pro/morphine-extended-release-capsules.html</a> |
| Naproxen           | CH | <a href="http://compendium.ch">compendium.ch</a>                                                                                         |
| Naproxen           | DE | <a href="http://pharmnet.bund">pharmnet.bund</a>                                                                                         |
| Naproxen           | UK | electronic medicines compendium (emc)                                                                                                    |
| Naproxen           | US | <a href="http://www.drugs.com/pro/naproxen-tablets.html">www.drugs.com/pro/naproxen-tablets.html</a>                                     |
| Nebivolol          | CH | <a href="http://compendium.ch">compendium.ch</a>                                                                                         |
| Nebivolol          | DE | <a href="http://pharmnet.bund">pharmnet.bund</a>                                                                                         |
| Nebivolol          | UK | electronic medicines compendium (emc)                                                                                                    |
| Nebivolol          | US | <a href="http://www.drugs.com/pro/nebivolol.html">www.drugs.com/pro/nebivolol.html</a>                                                   |
| Nimodipine         | CH | <a href="http://compendium.ch">compendium.ch</a>                                                                                         |
| Nimodipine         | DE | <a href="http://pharmnet.bund">pharmnet.bund</a>                                                                                         |
| Nimodipine         | UK | electronic medicines compendium (emc)                                                                                                    |
| Nimodipine         | US | <a href="http://www.drugs.com/pro/nimodipine.html">www.drugs.com/pro/nimodipine.html</a>                                                 |
| Nitrazepam         | CH | <a href="http://compendium.ch">compendium.ch</a>                                                                                         |
| Nitrazepam         | DE | <a href="http://pharmnet.bund">pharmnet.bund</a>                                                                                         |
| Nitrazepam         | UK | electronic medicines compendium (emc)                                                                                                    |
| Nitrofurantoin     | CH | <a href="http://compendium.ch">compendium.ch</a>                                                                                         |
| Nitrofurantoin     | DE | <a href="http://pharmnet.bund">pharmnet.bund</a>                                                                                         |
| Nitrofurantoin     | UK | electronic medicines compendium (emc)                                                                                                    |
| Nitrofurantoin     | US | <a href="http://www.drugs.com/pro/nitrofurantoin-capsules.html">www.drugs.com/pro/nitrofurantoin-capsules.html</a>                       |
| Oxycodone/Naloxone | CH | <a href="http://compendium.ch">compendium.ch</a>                                                                                         |
| Oxycodone/Naloxone | DE | <a href="http://pharmnet.bund">pharmnet.bund</a>                                                                                         |

|                      |    |                                                                                                                |
|----------------------|----|----------------------------------------------------------------------------------------------------------------|
| Oxycodone/Naloxone   | UK | electronic medicines compendium (emc)                                                                          |
| Phenprocoumon        | CH | compendium.ch                                                                                                  |
| Phenprocoumon        | DE | pharmnet.bund                                                                                                  |
| Pravastatin          | CH | compendium.ch                                                                                                  |
| Pravastatin          | DE | pharmnet.bund                                                                                                  |
| Pravastatin          | UK | electronic medicines compendium (emc)                                                                          |
| Pravastatin          | US | <a href="http://www.drugs.com/pro/pravastatin.html">www.drugs.com/pro/pravastatin.html</a>                     |
| Progesterone         | CH | compendium.ch                                                                                                  |
| Progesterone         | DE | pharmnet.bund                                                                                                  |
| Progesterone         | UK | electronic medicines compendium (emc)                                                                          |
| Progesterone         | US | <a href="http://www.drugs.com/pro/progesterone.html">www.drugs.com/pro/progesterone.html</a>                   |
| Propiverine          | DE | pharmnet.bund                                                                                                  |
| Propiverine          | UK | electronic medicines compendium (emc)                                                                          |
| Ranolazine           | CH | compendium.ch                                                                                                  |
| Ranolazine           | DE | pharmnet.bund                                                                                                  |
| Ranolazine           | UK | electronic medicines compendium (emc)                                                                          |
| Ranolazine           | US | <a href="http://www.drugs.com/pro/ranolazine-er-tablets.html">www.drugs.com/pro/ranolazine-er-tablets.html</a> |
| Rifampicin           | CH | compendium.ch                                                                                                  |
| Rifampicin           | DE | pharmnet.bund                                                                                                  |
| Rifampicin           | UK | electronic medicines compendium (emc)                                                                          |
| Rifampicin           | US | <a href="http://www.drugs.com/pro/rifampin-capsules.html">www.drugs.com/pro/rifampin-capsules.html</a>         |
| Rivaroxaban          | CH | compendium.ch                                                                                                  |
| Rivaroxaban          | DE | pharmnet.bund                                                                                                  |
| Rivaroxaban          | UK | electronic medicines compendium (emc)                                                                          |
| Rivaroxaban          | US | <a href="http://www.drugs.com/pro/xarelto.html">www.drugs.com/pro/xarelto.html</a>                             |
| Rosuvastatin         | CH | compendium.ch                                                                                                  |
| Rosuvastatin         | DE | pharmnet.bund                                                                                                  |
| Rosuvastatin         | UK | electronic medicines compendium (emc)                                                                          |
| Rosuvastatin         | US | <a href="http://www.drugs.com/pro/rosuvastatin-tablets.html">www.drugs.com/pro/rosuvastatin-tablets.html</a>   |
| Sacubitril/Valsartan | CH | compendium.ch                                                                                                  |
| Sacubitril/Valsartan | DE | fachinfo.de                                                                                                    |
| Sacubitril/Valsartan | UK | electronic medicines compendium (emc)                                                                          |
| Sacubitril/Valsartan | US | <a href="http://www.drugs.com/pro/entresto.html">www.drugs.com/pro/entresto.html</a>                           |
| Sildenafil           | CH | compendium.ch                                                                                                  |

|                       |    |                                                                                                            |
|-----------------------|----|------------------------------------------------------------------------------------------------------------|
| Sildenafil            | DE | fachinfo.de                                                                                                |
| Sildenafil            | UK | electronic medicines compendium (emc)                                                                      |
| Sildenafil            | US | <a href="http://www.drugs.com/pro/sildenafil-tablets.html">www.drugs.com/pro/sildenafil-tablets.html</a>   |
| Simvastatin           | CH | compendium.ch                                                                                              |
| Simvastatin           | DE | pharmnet.bund                                                                                              |
| Simvastatin           | UK | electronic medicines compendium (emc)                                                                      |
| Simvastatin           | US | <a href="http://www.drugs.com/pro/simvastatin.html">www.drugs.com/pro/simvastatin.html</a>                 |
| Sitagliptin/Metformin | CH | compendium.ch                                                                                              |
| Sitagliptin/Metformin | DE | pharmnet.bund                                                                                              |
| Sitagliptin/Metformin | UK | electronic medicines compendium (emc)                                                                      |
| Sitagliptin/Metformin | US | <a href="http://www.drugs.com/pro/janumet.html">www.drugs.com/pro/janumet.html</a>                         |
| Solifenacin           | CH | compendium.ch                                                                                              |
| Solifenacin           | DE | pharmnet.bund                                                                                              |
| Solifenacin           | UK | electronic medicines compendium (emc)                                                                      |
| Solifenacin           | US | <a href="http://www.drugs.com/pro/solifenacin-tablets.html">www.drugs.com/pro/solifenacin-tablets.html</a> |
| Tamsulosin            | CH | compendium.ch                                                                                              |
| Tamsulosin            | DE | pharmnet.bund                                                                                              |
| Tamsulosin            | UK | electronic medicines compendium (emc)                                                                      |
| Tamsulosin            | US | <a href="http://www.drugs.com/pro/tamsulosin.html">www.drugs.com/pro/tamsulosin.html</a>                   |
| Ticagrelor            | CH | compendium.ch                                                                                              |
| Ticagrelor            | DE | fachinfo.de                                                                                                |
| Ticagrelor            | UK | electronic medicines compendium (emc)                                                                      |
| Ticagrelor            | US | <a href="http://www.drugs.com/pro/ticagrelor.html">www.drugs.com/pro/ticagrelor.html</a>                   |
| Tilidine/Naloxone     | DE | pharmnet.bund                                                                                              |
| Torasemide            | CH | compendium.ch                                                                                              |
| Torasemide            | DE | pharmnet.bund                                                                                              |
| Torasemide            | UK | electronic medicines compendium (emc)                                                                      |
| Torasemide            | US | <a href="http://www.drugs.com/pro/torsemid.html">www.drugs.com/pro/torsemid.html</a>                       |
| Valproic acid         | CH | compendium.ch                                                                                              |
| Valproic acid         | DE | pharmnet.bund                                                                                              |
| Valproic acid         | UK | electronic medicines compendium (emc)                                                                      |
| Valproic acid         | US | <a href="http://www.drugs.com/pro/valproate.html">www.drugs.com/pro/valproate.html</a>                     |
| Valsartan             | CH | compendium.ch                                                                                              |
| Valsartan             | DE | pharmnet.bund                                                                                              |



|                      |    |                                                                                                                      |
|----------------------|----|----------------------------------------------------------------------------------------------------------------------|
| Valsartan            | UK | electronic medicines compendium (emc)                                                                                |
| Valsartan            | US | <a href="http://www.drugs.com/pro/valsartan-tablets.html">www.drugs.com/pro/valsartan-tablets.html</a>               |
| Valsartan/Amlodipine | CH | <a href="http://compendium.ch">compendium.ch</a>                                                                     |
| Valsartan/Amlodipine | DE | <a href="http://pharmnet.bund">pharmnet.bund</a>                                                                     |
| Valsartan/Amlodipine | UK | electronic medicines compendium (emc)                                                                                |
| Valsartan/Amlodipine | US | <a href="http://www.drugs.com/pro/amlodipine-and-valsartan.html">www.drugs.com/pro/amlodipine-and-valsartan.html</a> |
| Warfarin             | DE | <a href="http://pharmnet.bund">pharmnet.bund</a>                                                                     |
| Warfarin             | UK | electronic medicines compendium (emc)                                                                                |
| Warfarin             | US | <a href="http://www.drugs.com/pro/warfarin.html">www.drugs.com/pro/warfarin.html</a>                                 |
| Xipamide             | DE | <a href="http://pharmnet.bund">pharmnet.bund</a>                                                                     |
| Xipamide             | UK | electronic medicines compendium (emc)                                                                                |
| Zolpidem             | CH | <a href="http://compendium.ch">compendium.ch</a>                                                                     |
| Zolpidem             | DE | <a href="http://pharmnet.bund">pharmnet.bund</a>                                                                     |
| Zolpidem             | UK | electronic medicines compendium (emc)                                                                                |
| Zolpidem             | US | <a href="http://www.drugs.com/pro/zolpidem.html">www.drugs.com/pro/zolpidem.html</a>                                 |
| Zopiclone            | CH | <a href="http://compendium.ch">compendium.ch</a>                                                                     |
| Zopiclone            | DE | <a href="http://pharmnet.bund">pharmnet.bund</a>                                                                     |
| Zopiclone            | UK | electronic medicines compendium (emc)                                                                                |
